# Supplementary material for: Climate Change and Water Scarcity at the Focus of Environmental Impacts Associated with the COVID-19 Crisis in Spain
Source: MDPI journal article supplement (doi:10.3390/su151411001), 2023-07-13
Supplement: s1 [file s1]

# Climate change and water scarcity at the focus of environmental impacts associated with the COVID-19 crisis in Spain

**Cristina Cambeses-Franco<sup>a\*</sup>, Humberto José Urdaneta<sup>a</sup>, Gumersindo Feijoo<sup>a</sup>, Sara González-García<sup>a</sup> María Teresa Moreira<sup>a</sup>**

<sup>a</sup>CRETUS Centre. Department of Chemical Engineering, School of Engineering, Universidad de Santiago de Compostela, Rúa Lope Gómez de Marzoa s/n, 15782 Santiago de Compostela (Spain)

\*Corresponding author: cristina.cambeses.franco@usc.es

## SUPPLEMENTARY MATERIAL

**Table S1.** Daily intake ( $\text{g}\cdot\text{person}^{-1}\cdot\text{day}^{-1}$ ) per food item for the Spanish Dietary Pattern (SDP) in 2020.

|                       | Month |      |      |      |      |      |       |      |      |      |      |      |
|-----------------------|-------|------|------|------|------|------|-------|------|------|------|------|------|
|                       | 1     | 2    | 3    | 4    | 5    | 6    | 7     | 8    | 9    | 10   | 11   | 12   |
| Fruits                |       |      |      |      |      |      |       |      |      |      |      |      |
| Oranges               | 66.1  | 66.2 | 81.6 | 95.6 | 74.1 | 42.4 | 27.6  | 18.7 | 20.9 | 32.3 | 50.4 | 64.0 |
| Mandarin              | 35.2  | 29.3 | 25.8 | 21.5 | 6.3  | 0.9  | 0.6   | 1.2  | 4.8  | 27.0 | 41.0 | 42.2 |
| Banana                | 40.4  | 42.5 | 47.6 | 55.8 | 52.2 | 42.6 | 35.6  | 29.5 | 35.8 | 45.4 | 45.9 | 42.7 |
| Apple                 | 34.2  | 33.6 | 40.0 | 46.0 | 41.2 | 29.7 | 21.5  | 20.6 | 29.2 | 42.4 | 36.0 | 30.8 |
| Pear                  | 15.7  | 15.9 | 18.7 | 21.6 | 17.3 | 11.6 | 9.0   | 10.9 | 16.3 | 21.5 | 19.9 | 16.7 |
| Melon                 | 5.0   | 5.0  | 4.5  | 7.3  | 16.8 | 38.3 | 62.8  | 66.3 | 62.2 | 32.7 | 10.8 | 6.9  |
| Watermelon            | 0.0   | 0.4  | 1.5  | 6.1  | 40.2 | 79.5 | 101.8 | 81.2 | 41.6 | 7.7  | 0.5  | 0.4  |
| Lemon                 | 6.9   | 6.2  | 8.1  | 11.3 | 10.1 | 9.7  | 8.3   | 7.6  | 7.5  | 9.2  | 8.2  | 9.1  |
| Peaches               | 0.2   | 0.1  | 0.1  | 0.9  | 6.4  | 19.3 | 28.7  | 26.0 | 20.5 | 10.8 | 1.5  | 0.3  |
| Apricot               | 0.1   | 0.1  | 0.1  | 0.6  | 12.2 | 11.7 | 5.3   | 1.3  | 0.2  | 0.1  | 0.1  | 0.2  |
| Strawberry            | 6.1   | 16.4 | 22.9 | 27.4 | 20.1 | 4.3  | 1.6   | 1.1  | 1.1  | 1.0  | 0.8  | 1.9  |
| Plum                  | 0.8   | 0.9  | 1.0  | 1.3  | 1.2  | 4.9  | 8.9   | 9.7  | 10.2 | 5.9  | 1.8  | 0.4  |
| Grapes                | 4.8   | 2.4  | 2.4  | 2.9  | 2.8  | 1.7  | 3.0   | 6.4  | 17.0 | 20.8 | 13.3 | 12.2 |
| Kiwi                  | 9.7   | 10.3 | 10.2 | 11.8 | 10.4 | 8.3  | 7.9   | 6.5  | 7.1  | 10.3 | 10.2 | 11.1 |
| Pineapple             | 5.9   | 4.5  | 5.6  | 7.7  | 7.2  | 6.6  | 4.8   | 3.6  | 4.3  | 5.5  | 6.9  | 13.9 |
| Mango                 | 2.1   | 2.4  | 2.3  | 2.3  | 2.4  | 2.0  | 2.6   | 2.6  | 3.7  | 5.8  | 3.6  | 3.2  |
| Vegetables            |       |      |      |      |      |      |       |      |      |      |      |      |
| Tomatoes              | 53.3  | 55.8 | 62.6 | 73.2 | 76.9 | 71.7 | 75.5  | 65.7 | 70.7 | 62.5 | 61.0 | 54.8 |
| Onions                | 33.9  | 34.6 | 43.1 | 46.5 | 40.4 | 32.7 | 28.8  | 27.0 | 32.3 | 38.7 | 37.0 | 40.7 |
| Peppers               | 22.5  | 21.2 | 26.0 | 30.1 | 26.5 | 24.1 | 23.4  | 23.5 | 30.1 | 31.7 | 24.5 | 23.5 |
| Lettuce               | 18.8  | 19.2 | 22.6 | 24.8 | 24.4 | 20.2 | 17.5  | 16.1 | 17.3 | 19.1 | 19.5 | 19.5 |
| Carrot                | 19.5  | 17.8 | 21.6 | 24.7 | 21.4 | 16.3 | 13.9  | 12.6 | 15.7 | 18.4 | 18.0 | 18.5 |
| Courgette             | 18.8  | 21.2 | 24.4 | 27.5 | 25.3 | 19.6 | 17.3  | 15.1 | 18.3 | 19.8 | 21.2 | 18.6 |
| Cucumber              | 5.7   | 6.4  | 7.1  | 10.2 | 12.4 | 13.8 | 15.5  | 13.3 | 11.5 | 9.5  | 8.0  | 5.9  |
| Cabbage               | 10.6  | 9.7  | 10.1 | 10.8 | 7.0  | 5.0  | 3.4   | 3.5  | 6.0  | 9.6  | 10.3 | 10.6 |
| Garlic                | 3.4   | 3.4  | 4.2  | 4.5  | 4.1  | 3.3  | 2.8   | 2.5  | 3.1  | 3.2  | 3.5  | 3.9  |
| Mushroom              | 7.2   | 7.5  | 7.3  | 8.7  | 7.6  | 5.7  | 4.5   | 4.3  | 5.4  | 7.7  | 9.3  | 8.3  |
| Asparagus             | 2.0   | 2.6  | 5.2  | 5.8  | 6.5  | 2.8  | 1.1   | 1.0  | 1.3  | 2.0  | 1.5  | 2.1  |
| Aubergines            | 6.4   | 7.1  | 8.2  | 11.4 | 9.9  | 8.8  | 8.9   | 8.0  | 10.2 | 10.3 | 10.1 | 6.7  |
| Artichokes            | 10.4  | 16.3 | 13.7 | 13.2 | 9.4  | 1.9  | 0.6   | 0.2  | 0.3  | 1.0  | 3.8  | 7.4  |
| Leek                  | 6.8   | 5.6  | 6.6  | 7.0  | 5.5  | 3.6  | 2.7   | 2.8  | 4.1  | 5.9  | 6.2  | 5.8  |
| Green peas            | 1.2   | 1.2  | 1.5  | 1.5  | 1.4  | 1.1  | 0.9   | 0.9  | 0.8  | 1.2  | 1.0  | 1.1  |
| Pulses                |       |      |      |      |      |      |       |      |      |      |      |      |
| Chickpeas             | 4.7   | 4.3  | 6.8  | 5.7  | 4.3  | 3.7  | 3.2   | 3.2  | 3.9  | 5.2  | 5.0  | 3.9  |
| Beans                 | 3.2   | 2.9  | 4.7  | 3.7  | 3.0  | 2.7  | 2.2   | 2.1  | 2.9  | 3.8  | 3.3  | 2.6  |
| Lentils               | 3.6   | 3.2  | 5.3  | 3.5  | 3.2  | 2.8  | 2.4   | 2.2  | 3.2  | 3.8  | 3.5  | 2.8  |
| Starch-based products |       |      |      |      |      |      |       |      |      |      |      |      |

|                  |       |       |       |       |       |       |       |       |       |       |       |       |
|------------------|-------|-------|-------|-------|-------|-------|-------|-------|-------|-------|-------|-------|
| Bread            | 93.2  | 91.2  | 103.0 | 13.1  | 103.6 | 90.5  | 84.0  | 79.0  | 85.0  | 95.9  | 91.8  | 95.7  |
| Rice             | 12.2  | 11.6  | 17.9  | 13.3  | 12.4  | 11.4  | 11.1  | 10.1  | 10.7  | 13.1  | 11.4  | 11.3  |
| Pasta            | 13.4  | 12.6  | 18.5  | 114.2 | 13.1  | 11.8  | 11.7  | 10.8  | 11.3  | 13.8  | 12.5  | 12.8  |
| Potatoes         | 75.7  | 79.7  | 107.0 | 13.1  | 102.9 | 88.3  | 90.9  | 77.7  | 84.9  | 98.1  | 90.9  | 93.3  |
| Nuts             |       |       |       |       |       |       |       |       |       |       |       |       |
| Olives           | 8.7   | 9.0   | 11.5  | 15.1  | 14.4  | 12.7  | 12.3  | 10.4  | 9.8   | 11.5  | 12.1  | 13.6  |
| Almonds          | 0.9   | 0.8   | 0.9   | 1.6   | 0.9   | 0.8   | 0.6   | 0.5   | 1.7   | 2.6   | 1.1   | 1.5   |
| Walnut           | 2.7   | 2.8   | 3.0   | 3.4   | 3.0   | 2.3   | 1.9   | 1.5   | 1.7   | 3.7   | 3.9   | 4.7   |
| Peanut           | 1.2   | 1.3   | 1.7   | 2.1   | 1.9   | 1.4   | 1.1   | 1.0   | 1.2   | 1.6   | 1.6   | 1.7   |
| Hazelnut         | 0.3   | 0.3   | 0.3   | 0.4   | 0.3   | 0.3   | 0.2   | 0.2   | 0.3   | 0.3   | 0.5   | 0.5   |
| Pistachio        | 0.8   | 0.8   | 1.0   | 1.3   | 1.1   | 0.8   | 0.6   | 0.6   | 0.6   | 0.9   | 1.1   | 1.3   |
| Chestnut         | 0.0   | 0.0   | 0.0   | 0.0   | 0.0   | 0.0   | 0.0   | 0.0   | 0.0   | 0.0   | 0.0   | 0.0   |
| Dairy products   |       |       |       |       |       |       |       |       |       |       |       |       |
| Milk             | 251.3 | 238.9 | 297.7 | 296.8 | 279.5 | 255.7 | 250.8 | 226.1 | 243.3 | 267.3 | 252.0 | 262.6 |
| Yogurt           | 34.1  | 33.9  | 36.8  | 41.9  | 40.4  | 35.2  | 33.2  | 30.2  | 33.3  | 37.2  | 33.3  | 31.1  |
| Cheese           | 25.7  | 26.7  | 30.7  | 35.9  | 34.5  | 30.2  | 28.4  | 26.5  | 27.6  | 32.3  | 29.2  | 31.0  |
| Butter           | 1.2   | 1.5   | 1.8   | 2.3   | 1.8   | 1.3   | 1.3   | 1.2   | 1.3   | 1.6   | 1.4   | 1.9   |
| Eggs             |       |       |       |       |       |       |       |       |       |       |       |       |
| Eggs             | 24.2  | 23.5  | 29.5  | 23.5  | 31.2  | 31.2  | 25.5  | 25.5  | 25.5  | 25.5  | 25.5  | 25.5  |
| Meat             |       |       |       |       |       |       |       |       |       |       |       |       |
| Beef             | 15.7  | 14.8  | 18.2  | 18.4  | 17.5  | 14.6  | 13.8  | 11.9  | 14.3  | 18.3  | 16.3  | 18.7  |
| Chicken          | 38.6  | 36.6  | 47.2  | 50.3  | 46.1  | 41.2  | 36.5  | 33.2  | 37.5  | 42.6  | 40.5  | 40.4  |
| Pork             | 32.1  | 31.1  | 36.5  | 39.4  | 35.4  | 31.6  | 28.8  | 26.1  | 28.6  | 34.9  | 32.3  | 36.2  |
| Rabbit           | 2.8   | 2.6   | 3.3   | 3.1   | 3.1   | 2.8   | 2.8   | 2.3   | 2.8   | 2.9   | 2.7   | 2.3   |
| Sheep            | 3.9   | 3.6   | 3.7   | 4.7   | 4.4   | 3.8   | 3.3   | 3.3   | 2.9   | 3.6   | 3.7   | 10.7  |
| Turkey           | 4.7   | 4.8   | 5.0   | 5.2   | 4.8   | 4.2   | 4.4   | 3.5   | 4.2   | 5.0   | 4.4   | 5.0   |
| Processed meat   | 33.7  | 32.9  | 40.4  | 41.5  | 38.5  | 35.7  | 32.4  | 30.8  | 34.6  | 41.4  | 38.3  | 45.3  |
| Fish and seafood |       |       |       |       |       |       |       |       |       |       |       |       |
| Hake             | 14.6  | 15.5  | 17.6  | 18.0  | 18.2  | 15.1  | 14.1  | 11.2  | 13.8  | 15.4  | 14.7  | 13.0  |
| Mackerel         | 0.6   | 1.2   | 4.7   | 5.1   | 3.0   | 1.3   | 1.0   | 1.0   | 1.1   | 1.2   | 1.1   | 0.5   |
| Salmon           | 6.6   | 7.2   | 8.5   | 10.2  | 10.4  | 8.8   | 8.8   | 9.0   | 10.6  | 12.1  | 10.6  | 10.0  |
| Pilchard         | 1.3   | 1.4   | 2.3   | 1.6   | 1.8   | 1.7   | 1.6   | 1.3   | 1.3   | 1.5   | 1.1   | 1.0   |
| Cod              | 4.3   | 7.0   | 8.9   | 9.1   | 6.6   | 5.4   | 5.0   | 4.5   | 4.7   | 5.0   | 4.7   | 5.2   |
| Tuna             | 1.4   | 1.5   | 2.0   | 2.5   | 3.5   | 3.9   | 6.9   | 5.3   | 3.2   | 2.3   | 2.3   | 1.2   |
| Trout            | 1.5   | 1.4   | 1.6   | 2.0   | 1.8   | 1.7   | 1.2   | 1.2   | 1.4   | 1.3   | 1.4   | 1.2   |
| Sole             | 3.3   | 4.0   | 3.8   | 3.7   | 4.7   | 4.5   | 4.6   | 3.4   | 4.3   | 3.7   | 3.2   | 1.9   |
| Bass             | 4.4   | 4.1   | 4.6   | 4.5   | 5.1   | 4.8   | 3.3   | 3.2   | 4.1   | 4.7   | 4.5   | 4.5   |
| Gilt-head bream  | 3.9   | 3.9   | 4.7   | 5.5   | 5.5   | 4.6   | 4.2   | 3.5   | 4.1   | 5.8   | 4.6   | 5.1   |
| Turbot           | 0.7   | 0.4   | 0.5   | 1.1   | 1.2   | 0.9   | 0.8   | 0.8   | 0.7   | 0.9   | 0.8   | 1.7   |
| Angler           | 1.6   | 1.5   | 2.0   | 2.0   | 2.3   | 2.1   | 1.8   | 1.4   | 1.8   | 1.7   | 2.3   | 3.9   |
| Prawns           | 8.1   | 6.2   | 7.2   | 9.8   | 10.0  | 10.3  | 9.4   | 9.0   | 8.4   | 9.8   | 12.3  | 33.3  |
| Squids           | 7.5   | 6.5   | 8.2   | 8.7   | 9.4   | 9.2   | 8.0   | 7.2   | 8.2   | 9.0   | 9.1   | 11.3  |
| Mussels          | 5.8   | 5.1   | 3.7   | 4.9   | 5.0   | 4.9   | 7.2   | 6.8   | 6.4   | 6.2   | 7.0   | 9.6   |
| Clams            | 2.8   | 2.5   | 2.3   | 3.0   | 3.1   | 2.8   | 2.7   | 2.6   | 2.6   | 3.4   | 2.8   | 5.6   |
| Sweets           |       |       |       |       |       |       |       |       |       |       |       |       |
| Honey            | 1.4   | 1.4   | 1.6   | 1.9   | 1.5   | 1.2   | 1.0   | 0.7   | 1.3   | 1.8   | 1.5   | 1.6   |
| Sugar            | 10.4  | 10.0  | 15.6  | 17.7  | 13.2  | 11.0  | 8.9   | 8.4   | 10.0  | 13.2  | 12.9  | 14.3  |
| Ice cream        | 3.1   | 3.7   | 5.0   | 8.9   | 18.0  | 21.4  | 27.6  | 24.8  | 14.4  | 7.8   | 5.1   | 6.6   |
| Chocolate        | 12.6  | 11.4  | 14.4  | 17.3  | 13.8  | 10.3  | 8.8   | 8.2   | 9.7   | 14.0  | 17.0  | 25.4  |
| Pastry           | 20.4  | 20.4  | 21.7  | 24.5  | 21.0  | 18.1  | 16.2  | 15.5  | 17.6  | 23.0  | 23.8  | 27.2  |
| Biscuits         | 18.6  | 18.5  | 22.1  | 22.5  | 19.9  | 16.7  | 14.5  | 13.8  | 16.7  | 19.5  | 19.4  | 19.4  |
| Cereals          | 5.6   | 5.4   | 7.0   | 6.9   | 6.4   | 5.6   | 4.9   | 4.4   | 5.4   | 6.2   | 6.0   | 5.9   |
| Oils and fats    |       |       |       |       |       |       |       |       |       |       |       |       |

|                  |      |      |      |      |      |      |      |      |      |      |      |      |
|------------------|------|------|------|------|------|------|------|------|------|------|------|------|
| Sunflower oil    | 9.1  | 9.1  | 13.1 | 14.0 | 12.1 | 9.6  | 8.6  | 9.0  | 9.7  | 11.1 | 9.6  | 10.4 |
| Olive oil        | 21.1 | 21.1 | 25.6 | 24.0 | 25.7 | 24.8 | 21.5 | 20.7 | 22.0 | 27.2 | 22.8 | 22.4 |
| Margarine        | 1.6  | 1.7  | 2.3  | 2.7  | 2.1  | 1.7  | 1.5  | 1.5  | 1.6  | 1.9  | 1.8  | 1.9  |
| Ready meals      |      |      |      |      |      |      |      |      |      |      |      |      |
| Pizza            | 10.8 | 10.7 | 12.4 | 12.2 | 10.8 | 9.5  | 9.0  | 8.2  | 8.7  | 11.0 | 10.6 | 10.8 |
| Soups and creams | 27.5 | 23.1 | 26.8 | 23.1 | 22.0 | 23.9 | 24.5 | 20.7 | 22.6 | 27.3 | 25.4 | 25.7 |
| Sauces           | 10.3 | 10.4 | 12.7 | 14.0 | 13.5 | 12.5 | 11.6 | 10.8 | 11.1 | 12.5 | 11.5 | 13.5 |

**Table S2.** Daily intake (g-person<sup>-1</sup>·day<sup>-1</sup>) per food group for the Spanish Dietary Pattern (SDP) in 2019.

|                       | Month |       |       |       |       |       |       |       |       |       |       |       |
|-----------------------|-------|-------|-------|-------|-------|-------|-------|-------|-------|-------|-------|-------|
|                       | 1     | 2     | 3     | 4     | 5     | 6     | 7     | 8     | 9     | 10    | 11    | 12    |
| Fruits                |       |       |       |       |       |       |       |       |       |       |       |       |
| Oranges               | 71.2  | 66.6  | 73.8  | 66.8  | 64.7  | 47.9  | 33.6  | 23.2  | 22.8  | 29.4  | 47.4  | 54.6  |
| Mandarin              | 38.7  | 28.9  | 21.5  | 16.1  | 11.0  | 4.1   | 1.0   | 0.8   | 3.2   | 20.7  | 36.0  | 33.9  |
| Banana                | 38.7  | 37.3  | 41.9  | 40.9  | 43.9  | 39.0  | 33.1  | 29.7  | 34.9  | 40.4  | 42.1  | 37.7  |
| Apple                 | 31.9  | 31.0  | 35.7  | 33.1  | 32.2  | 24.8  | 20.8  | 18.4  | 26.4  | 36.9  | 34.3  | 29.7  |
| Pear                  | 15.8  | 14.7  | 16.8  | 14.9  | 14.4  | 10.4  | 8.6   | 11.0  | 14.6  | 19.5  | 19.6  | 14.8  |
| Melon                 | 4.3   | 3.6   | 4.3   | 4.1   | 12.7  | 33.6  | 65.0  | 69.4  | 59.7  | 27.2  | 8.3   | 6.6   |
| Watermelon            | 0.2   | 0.2   | 2.0   | 5.5   | 34.3  | 70.2  | 87.1  | 67.7  | 36.4  | 7.4   | 0.8   | 0.3   |
| Lemon                 | 6.7   | 5.8   | 6.4   | 6.4   | 7.4   | 7.5   | 8.3   | 7.2   | 7.2   | 7.1   | 8.2   | 8.0   |
| Peaches               | 0.1   | 0.1   | 0.1   | 0.2   | 4.3   | 16.0  | 25.7  | 25.4  | 25.1  | 16.0  | 2.6   | 0.2   |
| Apricot               | 0.1   | 0.2   | 0.1   | 0.2   | 8.8   | 14.5  | 6.9   | 1.8   | 0.6   | 0.2   | 0.1   | 0.1   |
| Strawberry            | 5.5   | 15.1  | 26.8  | 29.4  | 19.0  | 4.1   | 1.5   | 1.1   | 1.1   | 1.0   | 0.8   | 1.0   |
| Plum                  | 0.4   | 0.7   | 1.0   | 1.1   | 0.9   | 3.0   | 9.4   | 12.7  | 10.1  | 7.6   | 2.8   | 1.2   |
| Grapes                | 4.2   | 2.6   | 2.5   | 2.1   | 2.1   | 1.4   | 1.8   | 4.5   | 13.8  | 16.3  | 11.6  | 9.3   |
| Kiwi                  | 9.1   | 8.4   | 9.3   | 8.4   | 8.6   | 7.8   | 6.9   | 6.0   | 6.9   | 9.1   | 10.4  | 9.3   |
| Pineapple             | 7.5   | 5.4   | 6.0   | 5.6   | 6.3   | 4.9   | 4.5   | 3.2   | 4.3   | 5.0   | 5.4   | 12.9  |
| Mango                 | 1.8   | 1.9   | 1.8   | 1.5   | 1.9   | 1.6   | 1.5   | 2.0   | 3.3   | 5.8   | 3.6   | 2.9   |
| Total                 | 236.2 | 222.5 | 250.0 | 236.2 | 272.3 | 290.7 | 315.7 | 284.2 | 270.3 | 249.7 | 234.1 | 222.6 |
| Vegetables            |       |       |       |       |       |       |       |       |       |       |       |       |
| Tomatoes              | 53.1  | 51.4  | 57.4  | 51.0  | 61.9  | 65.6  | 71.8  | 66.5  | 71.2  | 63.5  | 53.7  | 47.6  |
| Onions                | 37.0  | 34.3  | 35.7  | 33.0  | 32.0  | 29.3  | 30.4  | 31.5  | 27.5  | 31.3  | 32.7  | 33.0  |
| Peppers               | 21.8  | 20.7  | 21.9  | 21.0  | 20.1  | 20.0  | 19.5  | 20.6  | 26.7  | 26.7  | 23.5  | 19.4  |
| Lettuce               | 18.0  | 16.9  | 19.5  | 16.9  | 20.6  | 19.2  | 19.1  | 15.5  | 16.2  | 18.6  | 16.6  | 18.3  |
| Carrot                | 18.9  | 16.9  | 16.4  | 15.9  | 15.2  | 13.4  | 13.0  | 11.8  | 15.0  | 15.7  | 17.1  | 15.5  |
| Courgette             | 18.0  | 19.7  | 20.8  | 18.7  | 19.4  | 16.7  | 16.5  | 15.2  | 17.4  | 19.9  | 17.3  | 16.4  |
| Cucumber              | 5.6   | 5.1   | 6.4   | 7.2   | 10.6  | 13.1  | 14.5  | 13.1  | 10.6  | 9.3   | 6.1   | 5.0   |
| Cabbage               | 10.7  | 8.9   | 7.6   | 5.6   | 5.2   | 4.4   | 4.3   | 4.1   | 5.2   | 6.8   | 10.7  | 8.5   |
| Garlic                | 3.8   | 3.2   | 3.6   | 3.5   | 3.0   | 3.0   | 4.9   | 3.7   | 2.4   | 3.2   | 3.1   | 3.2   |
| Mushroom              | 7.8   | 7.1   | 7.7   | 6.7   | 5.6   | 4.9   | 3.5   | 3.6   | 4.6   | 6.3   | 7.2   | 8.1   |
| Asparagus             | 1.7   | 2.9   | 6.2   | 7.3   | 7.2   | 3.1   | 1.8   | 1.0   | 1.8   | 1.8   | 2.0   | 1.7   |
| Aubergines            | 5.0   | 5.8   | 8.1   | 7.0   | 6.9   | 6.5   | 6.9   | 8.4   | 8.9   | 9.4   | 7.9   | 5.8   |
| Artichokes            | 12.9  | 15.7  | 15.9  | 11.1  | 7.8   | 2.6   | 0.9   | 0.4   | 0.6   | 1.4   | 2.9   | 4.8   |
| Leek                  | 6.3   | 5.7   | 5.5   | 4.9   | 4.0   | 3.7   | 2.8   | 2.9   | 4.4   | 5.0   | 5.8   | 5.0   |
| Green peas            | 1.1   | 1.1   | 1.2   | 0.9   | 1.0   | 1.0   | 0.9   | 0.9   | 0.8   | 0.8   | 0.9   | 0.9   |
| Total                 | 221.5 | 215.4 | 233.8 | 210.6 | 220.5 | 206.5 | 210.9 | 199.0 | 213.1 | 219.8 | 207.3 | 193.2 |
| Pulses                |       |       |       |       |       |       |       |       |       |       |       |       |
| Chickpeas             | 4.9   | 3.9   | 4.4   | 3.9   | 3.7   | 3.2   | 3.2   | 2.9   | 3.7   | 4.6   | 4.5   | 4.0   |
| Beans                 | 3.1   | 2.8   | 3.0   | 2.7   | 2.2   | 2.4   | 2.0   | 1.8   | 2.6   | 3.3   | 3.2   | 2.4   |
| Lentils               | 3.6   | 2.8   | 3.0   | 2.7   | 2.5   | 2.3   | 2.0   | 2.0   | 3.0   | 3.1   | 3.2   | 2.8   |
| Total                 | 11.6  | 9.5   | 10.4  | 9.3   | 8.4   | 7.9   | 7.2   | 6.7   | 9.3   | 11.1  | 10.9  | 9.2   |
| Starch-based products |       |       |       |       |       |       |       |       |       |       |       |       |

|                  |       |       |       |       |       |       |       |       |       |       |       |       |
|------------------|-------|-------|-------|-------|-------|-------|-------|-------|-------|-------|-------|-------|
| Bread            | 94.7  | 86.8  | 95.1  | 90.3  | 91.8  | 86.4  | 85.9  | 81.5  | 83.1  | 91.3  | 90.8  | 89.4  |
| Rice             | 11.9  | 11.4  | 11.8  | 11.2  | 11.5  | 10.6  | 10.3  | 10.1  | 10.3  | 11.5  | 10.9  | 10.1  |
| Pasta            | 13.4  | 11.6  | 12.3  | 11.7  | 11.9  | 11.3  | 10.9  | 10.4  | 11.5  | 12.3  | 13.0  | 12.0  |
| Potatoes         | 81.3  | 74.2  | 79.2  | 78.3  | 81.7  | 75.7  | 83.6  | 77.4  | 77.2  | 81.2  | 79.9  | 78.2  |
| Total            | 201.4 | 184.0 | 198.4 | 191.5 | 197.0 | 184.0 | 190.8 | 179.4 | 182.1 | 196.4 | 194.6 | 189.7 |
| Nuts             |       |       |       |       |       |       |       |       |       |       |       |       |
| Olives           | 9.0   | 8.3   | 9.5   | 10.0  | 10.0  | 9.9   | 10.7  | 10.2  | 9.1   | 9.7   | 10.6  | 10.4  |
| Almonds          | 0.8   | 0.8   | 0.9   | 0.8   | 0.8   | 0.8   | 0.7   | 0.7   | 1.5   | 1.1   | 1.1   | 1.9   |
| Walnut           | 3.3   | 2.8   | 2.8   | 2.5   | 2.5   | 2.0   | 1.6   | 1.4   | 1.9   | 3.2   | 3.8   | 4.2   |
| Peanut           | 1.1   | 1.2   | 1.3   | 1.4   | 1.2   | 1.0   | 1.0   | 0.9   | 1.0   | 1.2   | 1.2   | 1.5   |
| Hazelnut         | 0.3   | 0.3   | 0.3   | 0.3   | 0.3   | 0.3   | 0.2   | 0.2   | 0.1   | 0.3   | 0.3   | 0.5   |
| Pistachio        | 0.7   | 0.7   | 0.8   | 0.8   | 0.8   | 0.6   | 0.6   | 0.6   | 0.6   | 0.8   | 0.7   | 1.1   |
| Chestnut         | 0.0   | 0.0   | 0.0   | 0.0   | 0.0   | 0.0   | 0.0   | 0.0   | 0.0   | 0.0   | 0.0   | 0.0   |
| Total            | 15.1  | 14.1  | 15.5  | 15.7  | 15.6  | 14.7  | 14.8  | 14.0  | 14.2  | 16.2  | 17.8  | 19.6  |
| Dairy products   |       |       |       |       |       |       |       |       |       |       |       |       |
| Milk             | 265.1 | 237.2 | 254.2 | 250.5 | 257.3 | 238.8 | 238.3 | 232.2 | 234.4 | 250.3 | 246.3 | 240.4 |
| Yogurt           | 32.6  | 32.2  | 36.4  | 33.9  | 36.4  | 33.5  | 33.0  | 31.9  | 33.4  | 36.5  | 33.0  | 29.4  |
| Cheese           | 24.5  | 24.7  | 27.5  | 27.1  | 27.6  | 26.3  | 26.5  | 25.9  | 25.8  | 27.5  | 27.6  | 29.4  |
| Butter           | 1.2   | 1.1   | 1.2   | 1.2   | 1.1   | 1.0   | 1.0   | 1.1   | 1.1   | 1.3   | 1.3   | 1.6   |
| Total            | 323.3 | 295.2 | 319.3 | 312.6 | 322.4 | 299.6 | 298.9 | 291.0 | 294.7 | 315.6 | 308.1 | 300.9 |
| Eggs             |       |       |       |       |       |       |       |       |       |       |       |       |
| Total            | 23.2  | 21.6  | 24.3  | 21.6  | 23.4  | 23.4  | 22.9  | 22.9  | 22.9  | 22.9  | 22.9  | 22.9  |
| Meat             |       |       |       |       |       |       |       |       |       |       |       |       |
| Beef             | 15.8  | 14.3  | 15.0  | 14.4  | 15.1  | 12.8  | 13.1  | 12.1  | 13.6  | 15.6  | 15.7  | 16.6  |
| Chicken          | 40.8  | 36.5  | 40.3  | 37.1  | 37.8  | 35.0  | 33.7  | 33.9  | 35.4  | 37.9  | 39.1  | 36.2  |
| Pork             | 32.4  | 28.6  | 30.7  | 28.0  | 27.9  | 27.3  | 25.2  | 24.9  | 26.6  | 29.9  | 30.8  | 33.4  |
| Rabbit           | 2.8   | 2.7   | 3.3   | 2.7   | 3.0   | 2.8   | 2.5   | 2.5   | 2.4   | 2.6   | 2.6   | 2.6   |
| Sheep            | 5.1   | 3.5   | 3.9   | 4.5   | 3.2   | 3.0   | 2.8   | 3.1   | 3.0   | 2.9   | 3.5   | 9.5   |
| Turkey           | 4.9   | 4.4   | 4.8   | 4.6   | 4.7   | 4.5   | 4.4   | 3.7   | 4.3   | 4.7   | 4.4   | 5.4   |
| Processed meat   | 33.6  | 32.1  | 35.0  | 33.5  | 34.1  | 31.5  | 30.7  | 29.8  | 32.3  | 37.0  | 37.1  | 42.7  |
| Total            | 135.3 | 122.2 | 133.0 | 124.8 | 125.9 | 116.9 | 112.4 | 110.0 | 117.6 | 130.6 | 133.1 | 146.4 |
| Fish and seafood |       |       |       |       |       |       |       |       |       |       |       |       |
| Hake             | 16.7  | 15.7  | 16.8  | 15.5  | 15.4  | 15.1  | 14.4  | 12.9  | 13.6  | 14.0  | 13.6  | 14.0  |
| Mackerel         | 0.8   | 1.1   | 3.7   | 4.1   | 3.0   | 1.8   | 1.4   | 1.2   | 1.3   | 1.2   | 0.8   | 0.6   |
| Salmon           | 6.8   | 6.2   | 6.7   | 5.9   | 8.1   | 7.4   | 6.4   | 6.4   | 8.6   | 9.9   | 8.4   | 6.8   |
| Pilchard         | 1.2   | 1.2   | 1.4   | 1.4   | 1.5   | 1.8   | 1.7   | 1.3   | 1.4   | 1.4   | 1.2   | 1.0   |
| Cod              | 4.9   | 6.8   | 8.1   | 8.4   | 5.2   | 4.5   | 4.2   | 3.8   | 4.0   | 4.5   | 4.3   | 3.8   |
| Tuna             | 1.8   | 1.9   | 1.8   | 2.1   | 2.4   | 3.8   | 6.6   | 5.5   | 3.7   | 2.5   | 1.7   | 1.2   |
| Trout            | 1.6   | 1.5   | 1.6   | 1.4   | 1.8   | 1.6   | 1.5   | 1.2   | 1.1   | 1.4   | 1.4   | 1.0   |
| Sole             | 3.6   | 3.4   | 4.2   | 4.6   | 4.6   | 4.3   | 4.1   | 3.2   | 4.0   | 3.7   | 3.3   | 2.6   |
| Bass             | 3.9   | 3.5   | 3.6   | 3.4   | 3.8   | 3.7   | 3.4   | 2.8   | 3.2   | 3.2   | 3.9   | 3.4   |
| Gilt-head bream  | 3.8   | 3.2   | 3.9   | 3.8   | 3.9   | 3.7   | 3.6   | 3.8   | 3.6   | 4.2   | 4.2   | 4.1   |
| Turbot           | 0.7   | 0.6   | 0.4   | 0.6   | 0.8   | 0.5   | 0.3   | 0.4   | 0.4   | 0.6   | 0.5   | 1.0   |
| Angler           | 2.4   | 1.6   | 1.5   | 1.7   | 1.7   | 1.9   | 1.7   | 1.6   | 1.2   | 1.5   | 1.5   | 2.9   |
| Prawns           | 7.5   | 5.7   | 7.5   | 8.0   | 7.7   | 8.4   | 8.6   | 9.5   | 7.6   | 7.8   | 13.7  | 30.7  |
| Squids           | 7.8   | 6.9   | 7.6   | 7.9   | 8.1   | 7.5   | 8.1   | 7.1   | 7.4   | 8.2   | 8.0   | 8.1   |
| Mussels          | 6.1   | 5.8   | 5.6   | 4.7   | 3.6   | 5.0   | 6.0   | 6.2   | 6.0   | 6.6   | 6.7   | 8.7   |
| Clams            | 2.5   | 2.3   | 2.5   | 2.6   | 2.1   | 2.6   | 2.4   | 2.5   | 2.6   | 2.7   | 2.9   | 5.2   |
| Total            | 71.9  | 67.2  | 77.0  | 76.1  | 73.7  | 73.7  | 74.7  | 69.3  | 69.6  | 73.4  | 76.3  | 95.2  |
| Sweets           |       |       |       |       |       |       |       |       |       |       |       |       |
| Honey            | 1.9   | 1.3   | 1.3   | 1.4   | 1.3   | 0.9   | 1.1   | 1.2   | 1.1   | 1.4   | 1.4   | 1.9   |
| Sugar            | 10.8  | 9.7   | 11.5  | 11.5  | 10.2  | 8.9   | 7.9   | 8.8   | 9.5   | 11.5  | 11.2  | 13.4  |
| Ice cream        | 4.0   | 3.5   | 5.0   | 7.1   | 13.6  | 21.4  | 27.2  | 23.5  | 12.0  | 7.1   | 4.1   | 6.2   |

|                  |      |      |      |      |      |      |      |      |      |      |      |      |
|------------------|------|------|------|------|------|------|------|------|------|------|------|------|
| Chocolate        | 12.6 | 11.5 | 12.3 | 11.6 | 10.6 | 9.0  | 8.0  | 7.9  | 8.9  | 12.1 | 16.2 | 22.2 |
| Pastry           | 20.1 | 19.5 | 21.2 | 20.5 | 19.7 | 17.0 | 15.7 | 16.2 | 17.0 | 20.5 | 22.1 | 24.3 |
| Biscuits         | 18.8 | 18.4 | 19.8 | 18.5 | 17.9 | 15.9 | 14.8 | 14.0 | 16.7 | 18.5 | 18.6 | 19.3 |
| Cereals          | 5.6  | 5.2  | 5.8  | 5.4  | 5.5  | 4.8  | 4.7  | 4.3  | 5.1  | 5.6  | 5.5  | 5.5  |
| Total            | 73.9 | 69.1 | 76.9 | 76.2 | 78.9 | 77.9 | 79.4 | 75.8 | 70.3 | 76.6 | 79.1 | 92.7 |
| Oils and fats    |      |      |      |      |      |      |      |      |      |      |      |      |
| Sunflower oil    | 9.7  | 9.1  | 10.1 | 10.0 | 10.0 | 9.0  | 8.9  | 8.6  | 8.8  | 9.5  | 9.9  | 10.1 |
| Olive oil        | 19.8 | 17.3 | 19.6 | 20.6 | 20.6 | 19.9 | 19.5 | 19.1 | 20.5 | 21.8 | 21.0 | 21.5 |
| Margarine        | 1.8  | 1.9  | 1.8  | 1.8  | 1.7  | 1.5  | 1.4  | 1.5  | 1.5  | 1.7  | 1.7  | 1.8  |
| Total            | 31.3 | 28.3 | 31.6 | 32.5 | 32.3 | 30.4 | 29.8 | 29.2 | 30.8 | 33.0 | 32.5 | 33.4 |
| Ready meals      |      |      |      |      |      |      |      |      |      |      |      |      |
| Pizza            | 10.5 | 9.6  | 10.6 | 10.2 | 10.0 | 8.8  | 8.5  | 8.8  | 9.2  | 10.3 | 9.6  | 9.8  |
| Soups and creams | 25.9 | 19.9 | 19.9 | 19.7 | 20.5 | 21.8 | 23.5 | 21.2 | 20.5 | 23.6 | 24.0 | 23.6 |
| Sauces           | 10.0 | 9.2  | 10.7 | 10.2 | 11.0 | 10.7 | 10.7 | 10.6 | 10.0 | 10.6 | 9.9  | 12.0 |
| Total            | 46.3 | 38.7 | 41.2 | 40.1 | 41.6 | 41.3 | 42.7 | 40.6 | 39.7 | 44.6 | 43.4 | 45.4 |

**Table S3.** Carbon footprint per foodstuff.

| Foodstuff  | Source                          | Carbon footprint<br>(kgCO <sub>2</sub> eq·kg <sup>-1</sup> ) |
|------------|---------------------------------|--------------------------------------------------------------|
| Fruits     |                                 |                                                              |
| Oranges    | (Aguilera et al., 2015a)        | 0.15                                                         |
| Mandarine  | (Aguilera et al., 2015a)        | 0.15                                                         |
| Banana     | (Aguilera et al., 2015a)        | 0.64                                                         |
| Apple      | (Aguilera et al., 2015a)        | 0.12                                                         |
| Pear       | (Aguilera et al., 2015a)        | 0.12                                                         |
| Melon      | (Clune et al., 2017)            | 0.51                                                         |
| Watermelon | (Clune et al., 2017)            | 0.32                                                         |
| Lemon      | (Aguilera et al., 2015a)        | 0.15                                                         |
| Peaches    | (Aguilera et al., 2015a)        | 0.12                                                         |
| Apricot    | (Aguilera et al., 2015a)        | 0.12                                                         |
| Strawberry | (Gunady et al., 2012)           | 0.33                                                         |
| Plum       | (Audsley et al., 2009)          | 0.43                                                         |
| Grape      | (Aguilera et al., 2015a)        | 0.06                                                         |
| Kiwi       | (Zeus, 2012)                    | 0.83                                                         |
| Pineapple  | (West Africa Fair Fruit, 2011)  | 0.95                                                         |
| Mango      | (Frankowska et al., 2019)       | 0.88                                                         |
| Vegetables |                                 |                                                              |
| Tomato     | (Aguilera et al., 2015b)        | 0.22                                                         |
| Onion      | (Aguilera et al., 2015b)        | 0.24                                                         |
| Peppers    | (Aguilera et al., 2015b)        | 0.22                                                         |
| Lettuce    | (Aguilera et al., 2015b)        | 0.23                                                         |
| Carrots    | (Nemecek et al., 2012)          | 0.20                                                         |
| Courgette  | (Aguilera et al., 2015a)        | 0.20                                                         |
| Cucumber   | (Audsley et al., 2009)          | 1.30                                                         |
| Cabbage    | (Aguilera et al., 2015b)        | 0.24                                                         |
| Garlic     | (Khoshnevisan and Rafiee, 2013) | 0.39                                                         |
| Mushroom   | (Leiva et al., 2015)            | 1.82                                                         |
| Asparagus  | (Audsley et al., 2009)          | 2.22                                                         |
| Aubergines | (Audsley et al., 2009)          | 1.30                                                         |
| Artichoke  | (Audsley et al., 2009)          | 0.48                                                         |
| Leek       | (Clune et al., 2017)            | 0.39                                                         |
| Green peas | (Aguilera et al., 2015b)        | 0.60                                                         |
| Pulses     |                                 |                                                              |

|                       |                                                                             |       |
|-----------------------|-----------------------------------------------------------------------------|-------|
| Chickpeas             | (Clune et al., 2017)                                                        | 0.67  |
| Beans                 | (Clune et al., 2017)                                                        | 0.51  |
| Lentils               | (Clune et al., 2017)                                                        | 1.03  |
| Starch-based products |                                                                             |       |
| Bread                 | (Espinoza-Orias et al., 2011; Kulak et al., 2015; Notarnicola et al., 2017) | 1.15  |
| Rice                  | (Hess et al., 2016)                                                         | 2.31  |
| Pasta                 | (Hess et al., 2016)                                                         | 1.28  |
| Potatoes              | (Aguilera et al., 2015b)                                                    | 0.24  |
| Nuts                  |                                                                             |       |
| Olives                | (Clune et al., 2017)                                                        | 0.63  |
| Almond                | (Clune et al., 2017)                                                        | 1.74  |
| Walnut                | (Clune et al., 2017)                                                        | 1.62  |
| Peanut                | (Volpe et al., 2015)                                                        | 0.62  |
| Hazelnut              | (Clune et al., 2017)                                                        | 0.97  |
| Pistachio             | (Volpe et al., 2015)                                                        | 0.53  |
| Chestnut              | (Clune et al., 2017)                                                        | 0.43  |
| Dairy products        |                                                                             |       |
| Milk                  | (Iribarren et al., 2011)                                                    | 0.77  |
| Yogurt                | (González-García et al., 2013a)                                             | 1.50  |
| Cheese                | (González-García et al., 2013b)                                             | 10.44 |
| Butter                | (Vergéet al., 2013)                                                         | 7.20  |
| Eggs                  |                                                                             |       |
| Eggs                  | (Nielsen et al., 2013)                                                      | 1.80  |
| Meat                  |                                                                             |       |
| Beef                  | (van Oort and Andrew, 2016)                                                 | 24.69 |
| Pig                   | (Noya et al., 2017)                                                         | 2.50  |
| Chicken               | (González-García et al., 2014)                                              | 4.96  |
| Rabbit                | (Clune et al., 2017)                                                        | 5.72  |
| Sheep                 | (Clune et al., 2017)                                                        | 26.61 |
| Turkey                | (Clune et al., 2017)                                                        | 3.71  |
| Processed meat        | (Noya et al., 2017)                                                         | 14.55 |
| Fish and seafood      |                                                                             |       |
| Hake                  | (Iribarren et al., 2010b)                                                   | 5.98  |
| Mackerel              | (Vázquez-Rowe et al., 2010)                                                 | 1.54  |
| Salmon                | (Sherry and Koester, 2020)                                                  | 2.26  |
| Pilchard              | (González-García et al., 2015)                                              | 0.43  |
| Cod                   | (Ziegler et al., 2013)                                                      | 1.20  |
| Tuna                  | (Hospido and Tyedmers, 2005)                                                | 1.64  |
| Trout                 | (Clune et al., 2017)                                                        | 4.20  |
| Sole                  | (Clune et al., 2017)                                                        | 20.86 |
| Bass                  | (Clune et al., 2017)                                                        | 3.27  |
| Gilt-head bream       | (Clune et al., 2017)                                                        | 3.49  |
| Turbot                | (Clune et al., 2017)                                                        | 14.50 |
| Angler                | (Clune et al., 2017)                                                        | 3.49  |
| Prawns                | (Clune et al., 2017)                                                        | 14.85 |
| Squids                | (Iribarren et al., 2010b)                                                   | 3.86  |
| Mussels               | (Iribarren et al., 2010a)                                                   | 1.42  |
| Clams                 | (Iribarren et al., 2010a)                                                   | 1.42  |
| Sweets                |                                                                             |       |
| Honey                 | (Scarborough et al., 2014)                                                  | 1.00  |
| Sugar                 | (Klenk et al., 2012)                                                        | 0.23  |
| Ice-cream             | (Werner et al., 2014)                                                       | 2.80  |

|                   |                            |      |
|-------------------|----------------------------|------|
| Chocolate         | (Miah et al., 2018)        | 3.60 |
| Pastry            | (Clune et al., 2017)       | 0.52 |
| Biscuits          | (Konstantas et al., 2019)  | 1.03 |
| Breakfast cereals | (Jeswani et al., 2015)     | 2.64 |
| Oils and fats     |                            |      |
| Olive oil         | (Monini, 2014)             | 3.73 |
| Sunflower oil     | (Muñoz et al., 2014)       | 0.76 |
| Margarine         | (Nilsson et al., 2010)     | 1.36 |
| Ready meals       |                            |      |
| Soups and creams  | (Berners-Lee et al., 2012) | 4.00 |
| Pizza             | (Werner et al., 2014)      | 2.50 |
| Sauces            | (Berners-Lee et al., 2012) | 2.10 |

**Table S4.** Importing and exporting volumes, and distribution distances (import and national) per food item in 2020.

|                       | Export (t) | Import (t) | %N  | %I  | Lorry distance (km) | Ship distance (km) |
|-----------------------|------------|------------|-----|-----|---------------------|--------------------|
| Fruits                |            |            |     |     |                     |                    |
| Oranges               | 1638922    | 191327     | 89  | 11  | 416                 | 181                |
| Mandarine             | 1055655    | 17344      | 100 | 0   | 400                 | 1                  |
| Banana                | 96571      | 375340     | 45  | 55  | 198                 | 4185               |
| Apple                 | 142089     | 199924     | 71  | 29  | 535                 | 0                  |
| Pear                  | 116072     | 53668      | 80  | 20  | 537                 | 288                |
| Melon                 | 433749     | 95791      | 70  | 30  | 314                 | 1895               |
| Watermelon            | 839620     | 110036     | 77  | 23  | 447                 | 114                |
| Lemon                 | 733966     | 54501      | 73  | 27  | 375                 | 1619               |
| Peaches               | 654280     | 8110       | 99  | 1   | 402                 | 16                 |
| Apricot               | 860373     | 17002      | 100 | 0   | 400                 | 0                  |
| Strawberry            | 286853     | 19213      | 77  | 23  | 354                 | 129                |
| Plum                  | 89837      | 4270       | 95  | 5   | 392                 | 373                |
| Grape                 | 195275     | 70958      | 99  | 1   | 402                 | 72                 |
| Kiwi                  | 28124      | 138045     | 0   | 100 | 910                 | 9434               |
| Pineapple             | 23696      | 151447     | 0   | 100 | 83                  | 7870               |
| Mango                 | 59491      | 70302      | 0   | 100 | 59                  | 8250               |
| Tomato                | 728809     | 165324     | 96  | 4   | 417                 | 0                  |
| Onion                 | 572678     | 122672     | 88  | 12  | 409                 | 933                |
| Peppers               | 845359     | 62154      | 90  | 10  | 430                 | 0                  |
| Lettuce               | 829604     | 20971      | 89  | 11  | 471                 | 0                  |
| Carrots               | 128559     | 18007      | 93  | 7   | 433                 | 0                  |
| Courgette             | 425805     | 18015      | 91  | 9   | 421                 | 0                  |
| Cucumber              | 704371     | 7842       | 82  | 18  | 462                 | 0                  |
| Cabbage               | 493900     | 21475      | 100 | 0   | 400                 | 0                  |
| Garlic                | 189199     | 7665       | 91  | 9   | 405                 | 365                |
| Mushroom              | 4113       | 1511       | 99  | 1   | 412                 | 0                  |
| Asparagus             | 24339      | 10941      | 76  | 24  | 331                 | 2409               |
| Eggplant              | 171386     | 1226       | 98  | 2   | 408                 | 0                  |
| Artichoke             | 11552      | 230        | 100 | 0   | 400                 | 0                  |
| Leek                  | 27202      | 25979      | 67  | 33  | 621                 | 0                  |
| Green peas            | 2228       | 1522       | 99  | 1   | 406                 | 0                  |
| Pulses                |            |            |     |     |                     |                    |
| Chickpeas             | 5921       | 53105      | 45  | 55  | 181                 | 5813               |
| Beans                 | 6137       | 15305      | 77  | 23  | 482                 | 1481               |
| Lentils               | 8114       | 58906      | 32  | 68  | 126                 | 6280               |
| Starch-based products |            |            |     |     |                     |                    |

|                   |         |         |     |     |      |       |
|-------------------|---------|---------|-----|-----|------|-------|
| Bread             | 19189   | 18813   | 98  | 2   | 408  | 0     |
| Rice              | 299203  | 210458  | 72  | 28  | 1475 | 1442  |
| Pasta             | 155641  | 103398  | 61  | 39  | 721  | 105   |
| Potatoes          | 284809  | 914441  | 68  | 32  | 507  | 57    |
| Nuts              |         |         |     |     |      |       |
| Olives            | 13531   | 5494    | 99  | 1   | 400  | 0     |
| Almond            | 101772  | 112703  | 68  | 32  | 290  | 2753  |
| Walnut            | 1842    | 29118   | 35  | 65  | 205  | 6101  |
| Peanut            | 2941    | 45988   | 16  | 84  | 6248 | 23920 |
| Hazelnut          | 3832    | 5926    | 59  | 41  | 1666 | 267   |
| Pistachio         | 19      | 57      | 99  | 1   | 430  | 4     |
| Chestnut          | 7736    | 3038    | 98  | 2   | 401  | 40    |
| Dairy products    |         |         |     |     |      |       |
| Milk              | 76738   | 99910   | 99  | 1   | 409  | 0     |
| Yogurt            | 80789   | 115693  | 88  | 12  | 482  | 0     |
| Cheese            | 106958  | 304726  | 52  | 48  | 852  | 0     |
| Butter            | 7967    | 20654   | 4   | 96  | 1209 | 0     |
| Eggs              |         |         |     |     |      |       |
| Eggs              | 126509  | 15856   | 98  | 2   | 406  | 0     |
| Meat              |         |         |     |     |      |       |
| Beef              | 224449  | 111133  | 79  | 21  | 574  | 135   |
| Pig               | 2694756 | 109463  | 99  | 1   | 476  | 347   |
| Chicken           | 155858  | 87369   | 85  | 15  | 408  | 0     |
| Rabbit            | 6885    | 847     | 98  | 2   | 405  | 0     |
| Sheep             | 2515    | 152     | 98  | 2   | 422  | 0     |
| Turkey            | 2544    | 2257    | 99  | 1   | 415  | 0     |
| Processed meat    | 163508  | 88752   | 93  | 7   | 465  | 8     |
| Fish and seafood  |         |         |     |     |      |       |
| Hake              | 5761    | 29891   | 68  | 32  | 604  | 226   |
| Mackerel          | 6831    | 5953    | 0   | 100 | 457  | 0     |
| Salmon            | 939     | 58412   | 0   | 100 | 3012 | 0     |
| Pilchard          | 6117    | 14300   | 82  | 18  | 533  | 0     |
| Cod               | 423     | 5894    | 96  | 4   | 484  | 0     |
| Tuna              | 228     | 1815    | 99  | 1   | 403  | 0     |
| Trout             | 3888    | 1142    | 100 | 0   | 400  | 0     |
| Sole              | 670     | 4016    | 58  | 42  | 657  | 87    |
| Bass              | 5263    | 14219   | 57  | 43  | 1534 | 0     |
| Gilt-head bream   | 4445    | 25012   | 22  | 78  | 2223 | 158   |
| Turbot            | 3704    | 4181    | 51  | 49  | 474  | 0     |
| Angler            | 617     | 10701   | 18  | 82  | 1141 | 0     |
| Prawns            | 33      | 9200    | 34  | 66  | 134  | 4812  |
| Squids            | 8885    | 1961    | 73  | 27  | 560  | 0     |
| Mussels           | 10598   | 13313   | 95  | 5   | 383  | 605   |
| Clams             | 1846    | 20886   | 21  | 79  | 818  | 0     |
| Sweets            |         |         |     |     |      |       |
| Honey             | 28263   | 31690   | 3   | 97  | 2099 | 2866  |
| Sugar             | 126164  | 1173189 | 18  | 82  | 626  | 1661  |
| Ice-cream         | 38378   | 59324   | 100 | 0   | 1210 | 0     |
| Chocolate         | 116567  | 140840  | 23  | 77  | 1045 | 0     |
| Pastry            | 50      | 307     | 74  | 26  | 631  | 0     |
| Biscuits          | 201881  | 55159   | 80  | 20  | 537  | 98    |
| Breakfast cereals | 48190   | 325136  | 98  | 2   | 399  | 152   |
| Oils and fats     |         |         |     |     |      |       |
| Sunflower oil     | 222518  | 606633  | 0   | 100 | 5662 | 0     |
| Olive oil         | 1121436 | 249957  | 73  | 27  | 341  | 346   |
| Margarine         | 126039  | 58668   | 40  | 60  | 959  | 0     |



| Ready meals |        |        |    |    |     |    |
|-------------|--------|--------|----|----|-----|----|
| Pizza       | 125856 | 110303 | 97 | 3  | 410 | 17 |
| Soups       | 75849  | 23940  | 88 | 12 | 493 | 0  |
| Sauces      | 94720  | 21877  | 93 | 7  | 483 | 0  |

**Table S5.** Importing and exporting volumes, and distribution distances (import and national) per food item in 2019.

|                       | Export (t) | Import (t) | %N  | %I  | Lorry distance (km) | Ship distance (km) |
|-----------------------|------------|------------|-----|-----|---------------------|--------------------|
| Fruits                |            |            |     |     |                     |                    |
| Oranges               | 1756863    | 148549     | 91  | 9   | 466                 | 312                |
| Mandarine             | 1082744    | 17302      | 98  | 2   | 415                 | 9                  |
| Banana                | 99999      | 391506     | 43  | 57  | 204                 | 4066               |
| Apple                 | 127076     | 217563     | 70  | 30  | 536                 | 0                  |
| Pear                  | 137170     | 61334      | 76  | 24  | 552                 | 318                |
| Melon                 | 455783     | 94671      | 68  | 32  | 314                 | 2022               |
| Watermelon            | 910929     | 81709      | 78  | 22  | 428                 | 221                |
| Lemon                 | 739802     | 58564      | 71  | 29  | 330                 | 2399               |
| Peaches               | 837593     | 12813      | 98  | 2   | 407                 | 17                 |
| Apricot               | 1055075    | 21944      | 100 | 0   | 400                 | 0                  |
| Strawberry            | 300002     | 18568      | 74  | 26  | 489                 | 0                  |
| Plum                  | 94711      | 6185       | 93  | 7   | 390                 | 581                |
| Grape                 | 163728     | 69196      | 99  | 1   | 426                 | 71                 |
| Kiwi                  | 22041      | 136519     | 2   | 98  | 932                 | 8181               |
| Pineapple             | 36513      | 172440     | 0   | 100 | 101                 | 7704               |
| Mango                 | 46987      | 59737      | 0   | 100 | 43                  | 8717               |
| Vegetables            |            |            |     |     |                     |                    |
| Tomato                | 767369     | 198203     | 96  | 4   | 417                 | 0                  |
| Onion                 | 404587     | 81834      | 93  | 7   | 391                 | 654                |
| Peppers               | 828961     | 63259      | 90  | 10  | 429                 | 0                  |
| Lettuce               | 829872     | 23359      | 88  | 12  | 479                 | 0                  |
| Carrots               | 111023     | 19266      | 93  | 7   | 424                 | 0                  |
| Courgette             | 414930     | 19548      | 91  | 9   | 425                 | 0                  |
| Cucumber              | 709190     | 8477       | 78  | 22  | 513                 | 0                  |
| Cabbage               | 490278     | 23045      | 100 | 0   | 400                 | 0                  |
| Garlic                | 184283     | 4493       | 95  | 5   | 408                 | 134                |
| Mushroom              | 4306       | 1559       | 99  | 1   | 409                 | 0                  |
| Asparagus             | 25945      | 13463      | 71  | 29  | 295                 | 2977               |
| Eggplant              | 160162     | 1053       | 99  | 1   | 19                  | 0                  |
| Artichoke             | 13272      | 657        | 100 | 0   | 399                 | 30                 |
| Leek                  | 25210      | 23339      | 70  | 30  | 584                 | 0                  |
| Green peas            | 2918       | 1929       | 98  | 2   | 405                 | 0                  |
| Pulses                |            |            |     |     |                     |                    |
| Chickpeas             | 6020       | 57473      | 43  | 57  | 173                 | 6130               |
| Beans                 | 4798       | 36524      | 59  | 41  | 998                 | 233                |
| Lentils               | 3797       | 48467      | 39  | 61  | 158                 | 5575               |
| Starch-based products |            |            |     |     |                     |                    |
| Bread                 | 24927      | 15473      | 98  | 2   | 408                 | 0                  |
| Rice                  | 291849     | 210227     | 72  | 28  | 300                 | 2275               |
| Pasta                 | 144239     | 107840     | 61  | 39  | 722                 | 110                |
| Potatoes              | 302981     | 839271     | 70  | 30  | 503                 | 55                 |
| Nuts                  |            |            |     |     |                     |                    |
| Olives                | 12010      | 2685       | 100 | 0   | 403                 | 0                  |
| Almond                | 107825     | 110464     | 68  | 32  | 291                 | 2727               |
| Walnut                | 2527       | 32035      | 32  | 68  | 197                 | 6344               |

|                   |         |          |     |     |      |      |
|-------------------|---------|----------|-----|-----|------|------|
| Peanut            | 2470    | 50256    | 16  | 84  | 63   | 7149 |
| Hazelnut          | 4190    | 6288     | 57  | 43  | 1557 | 1398 |
| Pistachio         | 7       | 112      | 98  | 2   | 394  | 94   |
| Chestnut          | 8800    | 2555     | 99  | 1   | 402  | 44   |
| Dairy products    |         |          |     |     |      |      |
| Milk              | 87853   | 122300   | 99  | 1   | 409  | 0    |
| Yogurt            | 77433   | 130960   | 87  | 12  | 493  | 0    |
| Cheese            | 107581  | 309743   | 52  | 48  | 865  | 0    |
| Butter            | 11627   | 22036    | 0   | 100 | 1192 | 0    |
| Eggs              |         |          |     |     |      |      |
| Eggs              | 119301  | 21334    | 97  | 3   | 411  | 0    |
| Meat              |         |          |     |     |      |      |
| Beef              | 217937  | 136605   | 76  | 24  | 633  | 165  |
| Pig               | 2184047 | 114686   | 99  | 1   | 408  | 0    |
| Chicken           | 180799  | 95870    | 83  | 17  | 476  | 355  |
| Rabbit            | 5672    | 2140     | 96  | 4   | 407  | 0    |
| Sheep             | 1321    | 193      | 98  | 2   | 422  | 26   |
| Turkey            | 2605    | 2242     | 99  | 1   | 417  | 0    |
| Processed meat    | 150182  | 89427    | 93  | 7   | 463  | 10   |
| Fish and seafood  |         |          |     |     |      |      |
| Hake              | 6855    | 35570    | 63  | 37  | 552  | 831  |
| Mackerel          | 6566    | 8029     | 0   | 100 | 471  | 0    |
| Salmon            | 982     | 53354    | 0   | 100 | 1824 | 1186 |
| Pilchard          | 5658    | 17868    | 79  | 21  | 571  | 0    |
| Cod               | 493     | 5011     | 96  | 4   | 453  | 21   |
| Tuna              | 286     | 1084     | 100 | 0   | 401  | 0    |
| Trout             | 3964    | 1282     | 100 | 0   | 400  | 0    |
| Sole              | 855     | 4071     | 57  | 43  | 655  | 138  |
| Bass              | 7936    | 11816    | 58  | 42  | 846  | 740  |
| Gilt-head bream   | 4967    | 21349    | 24  | 76  | 1173 | 1309 |
| Turbot            | 4805    | 4038     | 44  | 56  | 491  | 0    |
| Angler            | 692     | 10038    | 19  | 81  | 603  | 525  |
| Prawns            | 121     | 11642    | 28  | 72  | 112  | 5144 |
| Squids            | 10876   | 2526     | 57  | 43  | 529  | 170  |
| Mussels           | 13232   | 11089    | 96  | 4   | 384  | 517  |
| Clams             | 2052    | 17047    | 23  | 77  | 838  | 0    |
| Sweets            |         |          |     |     |      |      |
| Honey             | 225258  | 26547    | 21  | 79  | 673  | 3589 |
| Sugar             | 165039  | 1739038  | 11  | 89  | 629  | 1524 |
| Ice-cream         | 48569   | 73253    | 100 | 0   | 1160 | 0    |
| Chocolate         | 120671  | 150554   | 20  | 80  | 1075 | 0    |
| Pastry            | 24      | 72       | 93  | 7   | 465  | 0    |
| Biscuits          | 192876  | 58101    | 80  | 20  | 670  | 0    |
| Breakfast cereals | 957215  | 15548030 | 43  | 57  | 1448 | 1154 |
| Oils and fats     |         |          |     |     |      |      |
| Sunflower oil     | 237274  | 598051   | 0   | 100 | 5613 | 0    |
| Olive oil         | 1077213 | 148562   | 83  | 17  | 382  | 179  |
| Margarine         | 128345  | 62567    | 37  | 63  | 877  | 0    |
| Ready meals       |         |          |     |     |      |      |
| Pizza             | 144943  | 85402    | 98  | 2   | 412  | 0    |
| Soups             | 69405   | 22899    | 89  | 11  | 486  | 0    |
| Sauces            | 85982   | 24323    | 93  | 7   | 492  | 0    |

## References

1. Aguilera, E., Guzmán, G., Alonso, A., 2015a. Greenhouse gas emissions from conventional and organic cropping systems in Spain. II. Fruit tree orchards. *Agron. Sustain. Dev.* 35, 725–737. <https://doi.org/10.1007/s13593-014-0265-y>
2. Aguilera, E., Guzmán, G., Alonso, A., 2015b. Greenhouse gas emissions from conventional and organic cropping systems in Spain. I. Herbaceous crops. *Agron. Sustain. Dev.* 35, 713–724. <https://doi.org/10.1007/s13593-014-0267-9>
3. Audsley, E., Brander, M., Chatterton, J., Murphy-bokern, D., Webster, C., Williams, A., 2009. How Low Can We Go? An assessment of greenhouse gas emissions from the UK food system and the scope to reduce them by 2050, WWF-UK and Food Climate Research Network. [https://assets.wwf.org.uk/downloads/how\\_low\\_report](https://assets.wwf.org.uk/downloads/how_low_report).
4. Berners-Lee, M., Hoolohan, C., Cammack, H., Hewitt, C.N., 2012. The relative greenhouse gas impacts of realistic dietary choices. *Energy Policy* 43, 184–190. <https://doi.org/10.1016/j.enpol.2011.12.054>
5. Clune, S., Crossin, E., Verghese, K., 2017. Systematic review of greenhouse gas emissions for different fresh food categories. *J. Clean. Prod.* 140, 766–783. <https://doi.org/10.1016/j.jclepro.2016.04.082>
6. Espinoza-Orias, N., Sitchnothe, H., Azapagic, A., 2011. The carbon footprint of bread. *Int J Life Cycle Assess* 16, 351–365. <https://doi.org/https://doi.org/10.1007/s11367-011-0271-0>
7. Frankowska, A., Jeswani, H.K., Azapagic, A., 2019. Life cycle environmental impacts of fruits consumption in the UK. *J. Environ. Manage.* 248, 109111. <https://doi.org/10.1016/j.jenvman.2019.06.012>
8. González-García, S., Castanheira, É.G., Dias, A.C., Arroja, L., 2013a. Environmental life cycle assessment of a dairy product: The yoghurt. *Int J Life Cycle Assess* 18, 796–811. <https://doi.org/10.1007/s11367-012-0522-8>
9. González-García, S., Gomez-Fernández, Z., Dias, A.C., Feijoo, G., Moreira, M.T., Arroja, L., 2014. Life Cycle Assessment of broiler chicken production: A Portuguese case study. *J. Clean. Prod.* 74, 125–134. <https://doi.org/10.1016/j.jclepro.2014.03.067>
10. González-García, S., Hospido, A., Moreira, M.T., Feijoo, G., Arroja, L., 2013b. Environmental life cycle assessment of a galician cheese: San Simon da Costa. *J. Clean. Prod.* 52, 253–262. <https://doi.org/10.1016/j.jclepro.2013.03.006>
11. González-García, S., Villanueva-Rey, P., Belo, S., Vázquez-Rowe, I., Moreira, M.T., Feijoo, G., Arroja, L., 2015. Cross-vessel eco-efficiency analysis. A case study for purse seining fishing from North Portugal targeting European pilchard. *Int J Life Cycle Assess* 20, 1019–1032. <https://doi.org/10.1007/s11367-015-0887-6>
12. Gunady, M.G.A., Biswas, W., Solah, V.A., James, A.P., 2012. Evaluating the global warming potential of the fresh produce supply chain for strawberries, romaine/cos lettuces (*Lactuca sativa*), and button mushrooms (*Agaricus bisporus*) in Western Australia using life cycle assessment (LCA). *J. Clean. Prod.* 28, 81–87. <https://doi.org/10.1016/j.jclepro.2011.12.031>
13. Hess, T., Chatterton, J., Daccache, A., Williams, A., 2016. The impact of changing food choices on the blue water scarcity footprint and greenhouse gas emissions of the British diet: The example of potato, pasta and rice. *J. Clean. Prod.* 112, 4558–4568. <https://doi.org/10.1016/j.jclepro.2015.08.098>
14. Hospido, A., Tyedmers, P., 2005. Life cycle environmental impacts of Spanish tuna fisheries. *Fish. Res.* 76, 174–186. <https://doi.org/10.1016/j.fishres.2005.05.016>
15. Iribarren, D., Hospido, A., Moreira, M.T., Feijoo, G., 2011. Benchmarking environmental and operational parameters through eco-efficiency criteria for dairy farms. *Sci. Total Environ.* 409, 1786–1798. <https://doi.org/10.1016/j.scitotenv.2011.02.013>
16. Iribarren, D., Moreira, M.T., Feijoo, G., 2010a. Revisiting the Life Cycle Assessment of mussels from a sectorial perspective. *J. Clean. Prod.* 18, 101–111. <https://doi.org/10.1016/j.jclepro.2009.10.009>
17. Iribarren, D., Vázquez-Rowe, I., Hospido, A., Moreira, M.T., Feijoo, G., 2010b. Estimation of the carbon footprint of the Galician fishing activity (NW Spain). *Sci. Total Environ.* 408, 5284–5294. <https://doi.org/10.1016/j.scitotenv.2010.07.082>
18. Jeswani, H.K., Burkinshaw, R., Azapagic, A., 2015. Environmental sustainability issues in the food-energy-water nexus: Breakfast cereals and snacks. *Sustain. Prod. Consum.* 2, 17–28. <https://doi.org/10.1016/j.spc.2015.08.001>
19. Khoshnevisan, B., Rafiee, A., 2013. Life cycle assessment of garlic production; a case study of Hamedan province, Iran. The 2nd National Conference on Sustainable Agricultural Development and Healthy Environment.
20. Klenk, I., Landquist, B., De Imaña, O.R., 2012. The product carbon footprint of EU beet sugar (part I). *Zucker-industrie* 137, 169–177. <https://doi.org/10.36961/si12784>
21. Konstantas, A., Stamford, L., Azapagic, A., 2019. Evaluation of environmental sustainability of biscuits at the product and sectoral levels. *J. Clean. Prod.* 230, 1217–1228. <https://doi.org/10.1016/j.jclepro.2019.05.095>

22. Kulak, K., Nemecek, T., Frossard, E., Chable, V., Gaillard, G., 2015. Life cycle assessment of bread from several alternative food networks in Europe. *J. Clean. Prod.* 90, 104–113. <https://doi.org/10.1016/j.jclepro.2014.10.060>
23. Leiva, F.J., Saenz-Díez, J.C., Martínez, E., Jiménez, E., Blanco, J., 2015. Environmental impact of *Agaricus bisporus* cultivation process. *Eur. J. Agron.* 71, 141–148. <https://doi.org/10.1016/j.eja.2015.09.013>
24. Miah, J.H., Griffiths, A., McNeill, R., Halvorson, S., Schenker, U., Espinoza-Orias, N.D., Morse, S., Yang, A., Sadhukhan, J., 2018. Environmental management of confectionery products: Life cycle impacts and improvement strategies. *J. Clean. Prod.* 177, 732–751. <https://doi.org/10.1016/j.jclepro.2017.12.073>
25. Monini, 2014. Environmental product declaration (EPD) for “Classico” Extra Virgin Olive Oil.
26. Muñoz, I., Schmidt, J.H., Dalgaard, R.L., 2014. Comparative life cycle assessment of five different vegetable oils. 9th Int. Conf. Life Cycle Assess. Agri-Food Sect.
27. Nemecek, T., Weiler, K., Plassmann, K., Schnetzer, J., Gaillard, G., Jefferies, D., García-Suárez, T., King, H., Milà I Canals, L., 2012. Estimation of the variability in global warming potential of worldwide crop production using a modular extrapolation approach. *J. Clean. Prod.* 31, 106–117. <https://doi.org/10.1016/j.jclepro.2012.03.005>
28. Nielsen, N.I., Jorgensen, M., Rasmussen, I.K., 2013. Greenhouse Gas Emission from Danish Organic Egg Production estimated via LCA Methodology. 1–27. <https://sp.landbrugsinfo.dk/Fjerkrae/Klima-o>.
29. Nilsson, K., Flysjö, A., Davis, J., Sim, S., Unger, N., Bell, S., 2010. Comparative life cycle assessment of margarine and butter consumed in the UK, Germany and France. *Int J Life Cycle Assess* 15, 916–926. <https://doi.org/10.1007/s11367-010-0220-3>
30. Notarnicola, B., Tassielli, G., Renzulli, P.A., Monforti, F., 2017. Energy flows and greenhouses gases of EU (European Union) national breads using an LCA (Life Cycle Assessment) approach. *J. Clean. Prod.* 140, 455–469. <https://doi.org/10.1016/j.jclepro.2016.05.150>
31. Noya, I., Aldea, X., González-García, S., M. Gasol, C., Moreira, M.T., Amores, M.J., Marín, D., Boschmonart-Rives, J., 2017. Environmental assessment of the entire pork value chain in Catalonia – A strategy to work towards Circular Economy. *Sci. Total Environ.* 589, 122–129. <https://doi.org/10.1016/j.scitotenv.2017.02.186>
32. Scarborough, P., Appleby, P.N., Mizdrak, A., Briggs, A.D.M., Travis, R.C., Bradbury, K.E., Key, T.J., 2014. Dietary greenhouse gas emissions of meat-eaters, fish-eaters, vegetarians and vegans in the UK. *Clim. Change* 125, 179–192. <https://doi.org/10.1007/s10584-014-1169-1>
33. Sherry, J., Koester, J., 2020. Life cycle assessment of aquaculture stewardship council certified Atlantic Salmon (*Salmo salar*). *Sustainability (Switzerland)* 12, 6079. <https://doi.org/10.3390/su12156079>
34. van Oort, B., Andrew, R., 2016. Climate footprints of Norwegian Dairy and Meat – a synthesis 1–74. <https://doi.org/10.13140/RG.2.2.17760.89602>
35. Vázquez-Rowe, I., Moreira, M.T., Feijoo, G., 2010. Life cycle assessment of horse mackerel fisheries in Galicia (NW Spain): Comparative analysis of two major fishing methods. *Fish. Res.* 106, 517–527. <https://doi.org/10.1016/j.fishres.2010.09.027>
36. Vergé, X.P.C., Maxime, D., Dyer, J.A., Desjardins, R.L., Arcand, Y., Vanderzaag, A., 2013. Carbon footprint of Canadian dairy products: Calculations and issues. *J. Dairy Sci.* 96, 6091–6104. <https://doi.org/10.3168/jds.2013-6563>
37. Volpe, R., Messineo, S., Volpe, M., Messineo, A., 2015. Carbon footprint of tree nuts based consumer products. *Sustainability (Switzerland)* 7, 14917–14934. <https://doi.org/10.3390/su71114917>
38. Werner, L.B., Flysjö, A., Tholstrup, T., 2014. Greenhouse gas emissions of realistic dietary choices in Denmark: The carbon footprint and nutritional value of dairy products. *Food Nutr. Res.* 58, 20687. <https://doi.org/10.3402/fnr.v58.20687>
39. West Africa Fair Fruit, 2011. Summary of Studies on Environmental Performance of Fresh Pineapple Produced in Ghana for Export to Europe.
40. Zeus, 2012. Environmental Product Declaration for 1 kg of wikifruit (inclusive of peel) eaten by consumers.
41. Ziegler, F., Winther, U., Hognes, E.S., Emanuelsson, A., Sund, V., Ellingsen, H., 2013. The Carbon Footprint of Norwegian Seafood Products on the Global Seafood Market. *J. Ind. Ecol.* 17, 103–116. <https://doi.org/10.1111/j.1530-9290.2012.00485.x>
